# Supplementary material for: Attitudes to Mental Illness and Its Demographic Correlates among General Population in Singapore
Source: PubMed Central journal article supplement (PMC5125689; doi:10.1371/journal.pone.0167297), 2016-11-28
Supplement: pone.0167297.s001.pdf [file pone.0167297.s001.pdf]

## **S1 Appendix. List of AMI items excluded.**

(Following the exclusion order in the analysis)

AMI- 14 People with mental illness are often made fun of.

AMI – 17 More should be done to protect the public from people with mental illness.

AMI – 21 Mental illness is an illness like any other.

AMI – 4 It would be foolish to marry a person who has suffered from mental illness, even though they seem fully recovered.

AMI – 20 People with mental health problems should have the same rights to a job as anyone else.

AMI – 12 People with mental illness don't deserve our understanding.
